# Supplementary material for: Novel oxalate-carbonate pathways identified in the tropical dry evergreen forest of Tamil Nadu, India
Source: Copernicus journal article supplement (doi:10.5194/egusphere-2025-3388), 2025-08-08
Supplement: Supplementary file 1 [file 20250515_SI_tables_Rieder_et_al_2025_TDEF_OCP_corr.xlsx]

## Sheet: S.Table_1_oxalate_species
Continent of observation	Species (checked with POWO, 2025)	Family	Soil OCP (HCl reaction)	Aerial OCP (HCl reaction)	References*
Africa	Cordia myxa L.	Boraginaceae	-	x	Randevoson, 2019
	Commiphora aprevalii (Baill.) Guillaumin	Burseraceae	-	x	Randevoson, 2019
	Boscia madagascariensis (DC.) Hadj-Moust.	Capparaceae	-	x	Randevoson, 2019
	Casuarina equisetifolia L.	Casuarinaceae	x	x	Randevoson, 2019
	Evonymopsis longipes (H.Perrier) H.Perrier	Celastraceae	-	x	Randevoson, 2019
	Terminalia rhopalophora Capuron	Combretaceae	-	x	Randevoson, 2019
	Afzelia africana Sm. ex Pers.	Fabaceae	x	x	Randevoson, 2019
	Baudouinia fluggeiformis Baill.	Fabaceae	-	x	Randevoson, 2019
	Dalbergia chlorocarpa R.Vig.	Fabaceae	-	x	Randevoson, 2019
	Dalbergia madagascariensis Vatke	Fabaceae	-	x	Randevoson, 2019
	Gyrocarpus americanus Jacq.	Hernandiaceae	-	x	Randevoson, 2019
	Tectona grandis L.f.	Lamiaceae	-	x	Randevoson, 2019
	Vitex beraviensis Vatke	Lamiaceae	-	x	Randevoson, 2019
	Foetidia asymetrica H.Perrier	Lecythidaceae	-	x	Randevoson, 2019
	Foetidia retusa Blume	Lecythidaceae	-	x	Randevoson, 2019
	Strychnos madagascariensis Poir.	Loganiaceae	-	x	Randevoson, 2019
	Bombax costatum Pellegr. & Vuillet	Malvaceae	x	x	Ferro, 2012
	Ceiba pentandra (L.) Gaertn.	Malvaceae	x	x	Randevoson, 2019
	Allaeanthus greveanus (Baill.) Capuron	Moraceae	-	x	Randevoson, 2019
	Ficus marmorata Bojer ex Baker	Moraceae	-	x	Randevoson, 2019
	Ficus polita Vahl	Moraceae	x	x	Randevoson, 2019
	Ficus sycomorus L.	Moraceae	x	x	Randevoson, 2019
	Milicia excelsa (Welw.) C.C.Berg	Moraceae	x	x	Bravo et al., 2015; Cailleau et al., 2011, 2004; Ferro, 2012; Pons et al., 2018
	Antidesma madagascariense var. madagascariense	Phyllanthaceae	x	x	Randevoson, 2019
	Bremeria perrieri (Homolle) Razafim. & Alejandro	Rubiaceae	-	x	Randevoson, 2019
	Hymenodictyon decaryi Homolle	Rubiaceae	-	x	Randevoson, 2019
Africa, North America	Tamarindus indica L.	Fabaceae	x	x	Randevoson, 2019; Steinmann, 2020; Hervé et al., 2021
North America	Mangifera indica L.	Anacardiaceae	-	x	Steinmann, 2020
	Carnegiea gigantea (Engelm.) Britton & Rose	Cactaceae	x	?	Garvie, 2003, 2006
	Delonix regia (Bojer ex Hook.) Raf.	Fabaceae	?	x	Steinmann, 2020
	Enterolobium cyclocarpum (Jacq.) Griseb.	Fabaceae	?	x	Steinmann, 2020
	Piscidia piscipula (L.) Sarg.	Fabaceae	-	x	Steinmann, 2020
	Cedrela odorata L.	Meliaceae	-	x	Steinmann, 2020
	Brosimum alicastrum Sw.	Moraceae	x	x	Álvarez‐Rivera et al., 2021; Rowley et al., 2017; Steinmann, 2020
	Ficus cotinifolia Kunth	Moraceae	-	x	Steinmann, 2020
	Gymnopodium floribundum Rolfe	Polygonaceae	-	x	Steinmann, 2020
South America	Terminalia amazonia (J.F.Gmel.) Exell	Combretaceae	x ?	x	Cailleau et al., 2014
	Terminalia oblonga (Ruiz & Pav.) Steud.	Combretaceae	x ?	x	Bravo et al., 2015; Cailleau et al., 2014
	Cenostigma pluviosum (DC.) Gagnon & G.P.Lewis	Fabacaee	x ?	-	Cailleau et al., 2014
	Apuleia leiocarpa (Vogel) J.F.Macbr.	Fabaceae	x ?	x	Cailleau et al., 2014
	Centrolobium ochroxylum Rose ex Rudd	Fabaceae	x ?	-	Cailleau et al., 2014
	Erythrina crista-galli L.	Fabaceae	x ?	-	Cailleau et al., 2014
	Hymenaea courbaril L.	Fabaceae	x ?	x	Cailleau et al., 2014
	Myroxylon balsamum (L.) Harms	Fabaceae	x ?	x	Cailleau et al., 2014
	Cariniana estrellensis (Raddi) Kuntze	Lecythidaceae	x ?	-	Cailleau et al., 2014
	Ceiba speciosa (A.St.-Hil., A.Juss. & Cambess.) Ravenna	Malvaceae	x	x	Cailleau et al., 2014
	Pentaplaris davidsmithii Dorr & C.Bayer	Malvaceae	x	x	Cailleau et al., 2014
	Clarisia racemosa Ruiz & Pav.	Moraceae	x ?	x	Cailleau et al., 2014
	Ficus coerulescens (Rusby) Rossberg	Moraceae	x ?	x	Cailleau et al., 2014
Asia	Buchanania lanzan Spreng.	Anacardiaceae	x	?	Clerc de Sonarclens, 2011
	Terminalia bellirica (Gaertn.) Roxb.	Combretaceae	x ?	x	Bravo et al., 2015; Clerc de Sonarclens, 2011; Hervé et al., 2018
	Terminalia elliptica Willd.	Combretaceae	x	x	Clerc de Sonarclens, 2011
	Diospyros melanoxylon Roxb.	Ebenaceae	x	?	Clerc de Sonarclens, 2011
	Soymida febrifuga (Roxb.) A.Juss.	Meliaceae	x	?	Aragno and Verrecchia, 2012
	Aegle marmelos (L.) Corrêa	Rutaceae	x	?	Aragno and Verrecchia, 2012; Clerc de Sonarclens, 2011
					*All full references are provided in the supplementary information file
Supplementary Information for: Rieder C., Verrecchia E. P., Bindschedler S., Cailleau G., Rozin A., Anbarashan M., Dasgupta S., Junier T., Roeschli N., Vittoz P., Rowley M. C.: Novel oxalate-carbonate pathways identified in the tropical dry evergreen forest of Tamil Nadu, India, 2025.
Corresponding author: Camille Rieder, Institute of Earth Surface Dynamics, University of Lausanne, Lausanne, Switzerland; Camille.Rieder@unil.ch

## Sheet: S.Table_2_tree_size_and_biomass
Tree	Species	Site	Approximate age	Tree height	DBH	Allometric Biomass	HCl 10% tree	HCl 10% soil
		(Fig. 1)		(m)	(m)	(kg)
A1	Artocarpus heterophyllus	Sadhana Forest	15	8.3	0.30	410.2	x	0/4
A2		Sadhana Forest	15	8	0.34	530.5	x	0/4
A3		Lake Farm Estate	25	8.6	0.41	1034.6	x	0/4
A4		Lake Farm Estate	25	11.5	0.64	2145.6	x	0/4
D1	Diospyros ebenum	Puthupet Sacred Grove	50	7.4	0.21	270.1	x	0/4
D2		Puthupet Sacred Grove	50	5.4	0.31	256.6	x	0/4
D3		Puthupet Sacred Grove	80	8.8	0.31	802.3	x	0/4
D4		Puthupet Sacred Grove	80	9	0.31	793.8	x	0/4
L1	Lepisanthes tetraphylla	Sadhana Forest	8	6.4	0.27	575.6	x	1/4
L2		Puthupet Sacred Grove	10	4.6	0.10	107	x	0/4
L3		Puthupet Sacred Grove	60	10.3	0.53	3142.7	x	0/4
L4		Sadhana Forest	100	6.4	0.61	3688	x	2/4
S1	Sapindus emarginatus	Aurodam	15	8.5	0.19	170.9		0/4
S2		Pitchandikulam	10	10.2	0.13	89.6		0/4
S3		Puthupet Sacred Grove	30	9.2	0.35	774.4	x	3/4
S4		Kuilapalayam	40	10.9	0.64	2950.7	x	2/4

## Sheet: S.Table_3_PCR_HTS
Tree number	Tree species	Sample type	Replicate	Conc. QuBit [ng µL-1]	PCR undiluted	PCR diluted 2 ng μL-1	HTS
S3	Sapindus emarginatus	Litter	1	159	X	X	X
S3			2	39.3	X	-	X
S3			3	161	X	X	X
D3	Diospyros ebenum		1	33.7	X	X	X
D3			2	19.2	X	X	X
D3			3	7.54	-	-	-
L4	Lepisanthes tetraphylla		1	18.7	X	-	X
L4			2	10.1	X	X	X
L4			3	5.87	X	X	X
S3	Sapindus emarginatus	Roots	1	9.8	X	-	X
S3			2	88.8	X	-	X
S3			3	125	X	-	X
D3	Diospyros ebenum		1	83.3	X	-	X
D3			2	73.4	X	-	-
D3			3	4.36	X	-	X
L4	Lepisanthes tetraphylla		1	7.29	X	-	X
L4			2	6.1	X	-	X
L4			3	5.17	X	X	X
S3	Sapindus emarginatus	Soil and roots	1	2.56	-	-	-
S3			2	133	-	-	X
S3			3	304	-	-	-
D3	Diospyros ebenum		1	10.1	-	-	-
D3			2	47.4	-	-	-
D3			3	5.22	-	-	X
L4	Lepisanthes tetraphylla		1	1.37	X	-	X
L4			2	11.3	X	-	X
L4			3	13.8	X	X	X
S3	Sapindus emarginatus	Adjacent soil	1	16	-	-	-
S3			2	35.5	-	-	X
S3			3	97	-	-	-
D3	Diospyros ebenum		1	12.3	-	-	-
D3			2	10.5	-	-	-
D3			3	43	-	-	X
L4	Lepisanthes tetraphylla		1	7.53	X	X	X
L4			2	6.52	X	-	X
L4			3	32.6	X	-	X
S3	Sapindus emarginatus	Control soil	1	8.16	-	-	X
S3			2	7.47	-	-	-
S3			3	11.5	-	-	-
D3	Diospyros ebenum		1	12.5	X	-	X
D3			2	1.85	-	-	-
D3			3	12.4	-	-	-
L4	Lepisanthes tetraphylla		1	72.5	X	-	X
L4			2	67.1	X	-	X
L4			3	46.2	X	-	X

## Sheet: S.Table_4_CaOx_25_species
Species (checked with POWO, 2025)	Family	TDEF	Introduced to India	HCl 10% tree	HCl 10% soil	CaOx in leaves (Carnoy Fluid)	Literature CaOx presence	Number of individuals in Sadhana Forest
Terminalia arjuna (Roxb. ex DC.) Wight & Arn.	Combretaceae			x	-	x	Srivastava et al., 1997	1-10
Terminalia bellirica (Gaertn.) Roxb.	Combretaceae			x	-	x	Hervé et al., 2018	1-10
Terminalia catappa L.	Combretaceae			-	-	?	Akpakpan and Akpabio, 2012	1
Diospyros ebenum J.Koenig	Ebenaceae	x		x	-	x	Wallnöfer, 2001	1-10
Diospyros ferrea (Willd.) Bakh.	Ebenaceae	x		-	-	x	Wallnöfer, 2001	26-50
Acacia auriculiformis A.Cunn. ex Benth.	Fabaceae		x	-	-	?	Sharma et al., 2017	>200
Acacia cf. holosericea A.Cunn. ex G.Don	Fabaceae		x	-	-	-	-	>200
Acacia mangium Willd.	Fabaceae		x	-	-	-	Sahri et al., 1993	26-50
Butea monosperma (Lam.) Kuntze	Fabaceae			-	-	-	Dhale et al., 2010	1
Dalbergia lanceolaria subsp. paniculata (Roxb.) Thoth.	Fabaceae	x		-	-	x	In genus: Khalid et al., 2015	1-10
Hardwickia binata Roxb.	Fabaceae			-	-	?	Chanda et al., 2019	26-50
Leucaena leucocephala (Lam.) de Wit	Fabaceae		x	-	-	n.d.	Malik et al., 2004	99-200
Senna siamea (Lam.) H.S.Irwin & Barneby	Fabaceae		x	x	-	?	Alli Smith, 2009	99-200
Ceiba pentandra (L.) Gaertn.	Malvaceae		x	x	-	n.d.	Friday et al., 2011	1-10
Khaya senegalensis (Desr.) A.Juss.	Meliaceae		x	-	-	?	Ibrahim et al., 2006	11-25
Artocarpus heterophyllus Lam.	Moraceae			x	-	-	Prakash et al., 2015	1-10
Ficus amplissima Sm.	Moraceae			-	-	-	-	1
Ficus benghalensis L.	Moraceae			-	-	x	Sharawy, 2004	1
Ficus racemosa L.	Moraceae			-	-	?	Paarakh, 2009	11-25
Ficus religiosa L.	Moraceae			-	-	x	Pierantoni et al., 2018; Sharawy, 2004	1-10
Syzygium cumini (L.) Skeels	Myrtaceae	x		-	-	x	Jadhav, 2009	51-100
Aegle marmelos (L.) Corrêa	Rutaceae			-	-	x	Pande et al., 2018	1-10
Lepisanthes tetraphylla (Vahl) Radlk.	Sapindaceae	x		x	4/4	x	-	11-25
Sapindus emarginatus Vahl	Sapindaceae	x		x	3/4	x	-	-
Manilkara hexandra (Roxb.) Dubard	Sapotaceae	x		-	-	?	Chanda et al., 2010	11-25
							*All full references are provided in the supplementary information file

## Sheet: S.Table_5_CaOx_content
Species	Leaves	Litter	Branches	Bark	Inside trunk	Roots	Total	Leaves	Branches	Bark	Roots	Total
	CaOx % dry weight±SD							CaOx kg±SD
Artocarpus heterophyllus	1.4±0.6	2.7±0.6	5.8±2.4	4.9±1.9	-	2.2±0.7	3.2±0.6	2.1±1.1	19.2±10.7	1.5±0.4	4.2±1.7	37.0±11.9
Diospyros ebenum	5.0±1.7	3.8±3.0	3.0±1.9	13.4±3.3	1.53	4.9±3.2	3.2±1.1	2.9±0.5	3.3±0.8	1.3±0.4	4.0±0.8	19.5±4.3
Lepisanthes tetraphylla	5.2±1.1	4.1±1.1	4.7±4.3	6.2±4.7	3.54	3.3±1.7	3.8±1.2	13.4±6.8	20.1±8.9	1.5±0.6	13.7±8	65.6±35.6
Sapindus emarginatus	3.2±2.0	3.2±1.3	2.9±1.6	6.8±3.2	0.65	2.6±0.6	2.0±0.6	4.3±3.1	7.9±6.7	0.9±0.5	4.6±3.3	21.3±13.1
Total	3.7±2.1	3.4±1.7	4.7±4.3	7.8±4.6	1.9±1.5	3.2±2.0	4.4±3.2	5.7±2.9	12.6±6.8	1.3±0.5	6.6±3.4	-

## Sheet: S.Table_6_PERMANOVA_P_Values
Variable 1	Variable 2	Adjusted p-value
L. tetraphylla	D. ebenum	0.0014985
L. tetraphylla	S. emarginatus	0.0014985
D. ebenum	S. emarginatus	0.010989
Roots	Litter	0.000999
Rhizosphere soil	Litter	0.000999
Control soil	Litter	0.000999
Adjacent soil	Litter	0.000999
Rhizosphere soil	Roots	0.000999
Control soil	Roots	0.000999
Adjacent soil	Roots	0.000999
Control soil	Rhizosphere soil	0.013986
Adjacent soil	Rhizosphere soil	0.001998
Adjacent soil	Control soil	0.047952

## Sheet: S.Table_7_Bulk_soil_properties
Tree number	Species	Sampling site	Parent material	Tree size	Sample type	Total N	SOC	C:N ratio	pH (distilled water)	pH (1 M KCl)	Ca2+Exch	K+Exch	Mg2+Exch	Sum Exch. Ca2+, K+, Mg2+	Al3+Exch	Sum all exchangeable cations	CaCO3 equivalent
						(g kg-1)	(g kg-1)				(cmolc kg-1)	(cmolc kg-1)	(cmolc kg-1)	(cmolc kg-1)	(cmolc kg-1)	(cmolc kg-1)	(g kg-1)
D3	Diospyros ebenum	Puthupet Sacred Grove	Alluvium	Large	Trunk soil	3.05324	36.3174	11.8947	6.89	6.58	13.2935	0.430697	2.01917	13.7242	0.0103996	15.7538	7.392
L4	Lepisanthes tetraphylla	Sadhana Forest	Cuddalore sandstone	Large		1.28605	14.2319	11.0663	9.1	7.96	9.57841	5.35062	3.41487	14.929	0.0458617	18.3898	45.443
S3	Sapindus emarginatus	Puthupet Sacred Grove	Alluvium	Large		5.63268	77.7098	13.7962	8.14	7.68	17.5045	1.45247	6.1911	18.957	0	25.1481	34.363
A1	Artocarpus heterophyllus	Sadhana Forest	Cuddalore sandstone	Small	Adjacent soil	0.490042	5.58924	11.4056	6.42	6.11	4.167	0.257	1.604	4.424	0.184568	6.21257	0.406
A2		Sadhana Forest	Cuddalore sandstone	Small		0.547589	6.04243	11.0346	5.83	4.53	2.57222	0.217798	1.66724	2.79002	0.0299703	4.48722	4.222
A3		Lake Estate	Cuddalore sandstone	Large		0.324122	4.39768	13.568	6.68	5.48	2.26837	0.281007	0.639932	2.54938	0.0765054	3.26581	0.415
A4		Lake Estate	Cuddalore sandstone	Large		1.19	14.8508	12.4797	6.93	6.06	7.71476	0.40121	1.25123	8.11597	0.0198935	9.38709	0.629
D1	Diospyros ebenum	Puthupet Sacred Grove	Alluvium	Small		0.587313	8.08359	13.7637	6.53	5.43	2.39734	0.264112	0.40206	2.66145	0.0279357	3.09145	0.394
D2	Diospyros ebenum	Puthupet Sacred Grove	Alluvium	Small		0.455984	6.33464	13.8922	5.94	4.86	1.06421	0.067851	0.281014	1.13206	0.0599445	1.47302	0.459
D3	Diospyros ebenum	Puthupet Sacred Grove	Alluvium	Large		0.445941	6.10759	13.696	5.28	4.02	0.794041	0.0876881	0.10448	0.881729	0.185826	1.17203	4.531
D4	Diospyros ebenum	Puthupet Sacred Grove	Alluvium	Large		0.340201	6.06132	17.8169	6.01	4.5	0.613782	0.121704	0.227919	0.735486	0.0946563	1.05806	3.788
L1	Lepisanthes tetraphylla	Sadhana Forest	Cuddalore sandstone	Small		0.345629	4.81218	13.9229	7.12	5.34	1.969	0.069	0.947	2.038	0.2318	3.2168	0.339
L2	Lepisanthes tetraphylla	Puthupet Sacred Grove	Alluvium	Small		0.474179	5.90092	12.4445	5.68	4.59	0.969659	0.114062	0.397331	1.08372	0.093044	1.5741	4.537
L3	Lepisanthes tetraphylla	Puthupet Sacred Grove	Alluvium	Large		0.170535	2.66233	15.6116	6.34	4.89	0.370765	0.0873443	0.231044	0.458109	0.0713113	0.760465	0.494
L4	Lepisanthes tetraphylla	Sadhana Forest	Cuddalore sandstone	Large		0.505145	6.42745	12.724	7.36	5.87	7.111	0.341	3.027	7.452	0.198209	10.6772	5.232
S1	Sapindus emarginatus	Aurodam	Cuddalore sandstone	Small		0.836758	12.0062	14.3485	6.57	5.47	4.49305	0.200085	0.953638	4.69314	0.0501103	5.69689	0.537
S2	Sapindus emarginatus	Pitchandikulam	Cuddalore sandstone	Small		0.327236	5.07138	15.4976	5.48	4.31	1.17393	0.0820248	0.585726	1.25596	0.181203	2.02288	0.397
S3	Sapindus emarginatus	Puthupet Sacred Grove	Alluvium	Large		0.362959	5.00677	13.7943	6.65	5.42	0.756491	0.0857243	0.470865	0.842215	0.0100028	1.32308	4.892
S4	Sapindus emarginatus	Kuilapalayam	Cuddalore sandstone	Large		2.05229	28.1041	13.694	6.57	5.91	6.91842	0.278304	1.28443	7.19673	0	8.48116	0.692
A1	Artocarpus heterophyllus	Sadhana Forest	Cuddalore sandstone	Small	Control	0.52897	6.4612	12.2147	7.4	6.18	5.39347	0.176352	1.86808	5.56982	0.0797237	7.51762	0.625
A2		Sadhana Forest	Cuddalore sandstone	Small		0.459139	5.06614	11.034	5.83	4.53	3.42339	0.126172	2.08694	3.54957	0.0728019	5.7093	7.064
A3		Lake Estate	Cuddalore sandstone	Large		0.242006	2.56132	10.5837	7.36	5.82	2.02358	0.0334466	0.719467	2.05702	0.504978	3.28147	0.548
A4		Lake Estate	Cuddalore sandstone	Large		0.390569	5.0372	12.8971	6.68	5.34	2.72819	0.020438	0.641889	2.74863	0.0696154	3.46013	0.44
D1	Diospyros ebenum	Puthupet Sacred Grove	Alluvium	Small		0.312528	4.65958	14.9093	6.96	6	1.55106	0.0733727	0.461518	1.62444	0.00915808	2.09511	0.547
D2	Diospyros ebenum	Puthupet Sacred Grove	Alluvium	Small		0.277036	3.64006	13.1393	5.51	4.49	0.410389	0.0399772	0.205425	0.450366	0.213222	0.869014	0.507
D3	Diospyros ebenum	Puthupet Sacred Grove	Alluvium	Large		0.221977	3.69215	16.633	7.24	5.61	0.482884	0.0371057	0.136773	0.51999	0.0267271	0.68349	5.145
D4	Diospyros ebenum	Puthupet Sacred Grove	Alluvium	Large		0.204381	3.08538	15.0963	5.43	4.48	0.181567	0.0548812	0.103837	0.236448	0.169446	0.509731	2.925
L1	Lepisanthes tetraphylla	Sadhana Forest	Cuddalore sandstone	Small		0.527253	4.82789	9.15668	7.18	5.5	10.4407	0.0654907	3.57469	10.5062	0.228826	14.3097	0.907
L2	Lepisanthes tetraphylla	Puthupet Sacred Grove	Alluvium	Small		0.318114	3.91495	12.3068	5.94	4.87	0.80954	0.0585168	0.31149	0.868056	0.216296	1.39584	4.306
L3	Lepisanthes tetraphylla	Puthupet Sacred Grove	Alluvium	Large		0.305795	2.99452	9.79257	5.6	4.12	0.21799	0.0418323	0.139397	0.259822	0.124403	0.523622	5.148
L4	Lepisanthes tetraphylla	Sadhana Forest	Cuddalore sandstone	Large		0.376169	4.62235	12.288	7.51	6.19	14.5034	0.202317	2.71933	14.7057	0.00631474	17.4314	8.773
S1	Sapindus emarginatus	Aurodam	Cuddalore sandstone	Small		0.908931	10.3107	11.3438	6.78	5.77	4.50788	0.0530629	1.01464	4.56094	0.0112941	5.58688	0.449
S2	Sapindus emarginatus	Pitchandikulam	Cuddalore sandstone	Small		0.413941	5.81042	14.0368	6.03	4.62	1.0551	0.054949	0.561116	1.11004	0.102477	1.77364	0.341
S3	Sapindus emarginatus	Puthupet Sacred Grove	Alluvium	Large		0.478211	6.83856	14.3003	5.36	4.4	0.671041	0.0554339	0.16603	0.726475	0.171696	1.0642	4.198
S4	Sapindus emarginatus	Kuilapalayam	Cuddalore sandstone	Large		0.353551	5.07325	14.3494	5.37	4.2	0.628303	0.0964195	0.144148	0.724723	0.452737	1.32161	0.356
L4	Lepisanthes tetraphylla	Sadhana Forest	Cuddalore sandstone	Large	Near root soil	2.7	89.05	32.9815	NA	7.68	16.53	0.769	9.204	17.299	0.21045	26.7134	72.783

## Sheet: S.Table_8_XRF_data
Tree number	Species	Sampling site	Parent material	Sample type	Major										Trace
					Al	Ca	Fe	K	Mg	Mn	Na	P	Si	Ti	Ba	Co	Cr	Cu	Nb	Ni	Rb	Sc	Sr	V	Y	Zn	Zr
					(g kg-1)										(mg kg-1)
D3	Diospyros ebenum	Puthupet Sacred Grove	Alluvium	Trunk soil	23.601	5.226	12.11	2.089	0.911	0.468	0.523	0.483	428.182	4.103	128	10	256	20	14	29	13	5	50	41	23	35	509
L4	Lepisanthes tetraphylla	Sadhana Forest	Cuddalore sandstone		55.277	19.106	26.604	10.859	5.158	0.312	0.746	0.395	373.064	4.583	340	10	300	18	12	49	62	8	176	63	24	44	543
S3	Sapindus emarginatus	Puthupet Sacred Grove	Alluvium		26.596	18.246	17.868	2.673	2.761	0.662	0.596	1.098	409.838	3.919	220	11	849	1994	12	41	18	6	485	45	21	65	497
A1	Artocarpus heterophyllus	Sadhana Forest	Cuddalore sandstone	Adjacent soil	23.907	1.866	25.333	5.93	1.153	0.312	1.493	0.132	417.173	5.789	224	8	1171	26	14	46	20	3	47	47	18	30	625
A2		Sadhana Forest	Cuddalore sandstone		33.218	0.819	16.647	6.753	1.211	0.233	0.522	0.088	416.132	5.718	227	4	191	7	13	26	25	4	38	48	21	23	657
A3		Lake Estate	Cuddalore sandstone		29.901	0.525	15.341	1.594	0.488	0.313	0.375	0.176	429.395	3.271	83	14	162	7	9	24	11	5	17	44	12	17	329
A4		Lake Estate	Cuddalore sandstone		28.467	2.32	15.741	2.262	0.791	0.313	0.973	0.22	426.806	3.992	138	12	193	9	12	21	11	4	36	45	13	33	411
D1	Diospyros ebenum	Puthupet Sacred Grove	Alluvium		19.178	0.979	8.164	1.685	0.551	0.236	0.452	0.221	438.959	3.894	91	7	110	7	11	19	11	3	25	37	18	13	570
D2		Puthupet Sacred Grove	Alluvium		11.614	0.516	6.876	1.154	0.419	0.154	0.368	0.087	448.032	3.214	68	4	192	7	10	14	7	0	17	27	12	9	424
D3		Puthupet Sacred Grove	Alluvium		26.9103	17.3661	22.6322	2.58604	2.66655	0.700422	0.596387	1.05254	406.954	4.03533	209.015	11.5561	1307.15	1746.28	11.8576	51.1483	18.4898	6.73269	441.845	47.7317	21.1024	65.4176	528.566
D4		Puthupet Sacred Grove	Alluvium		14.501	0.445	8.463	1.494	0.482	0.387	0.445	0.175	443.433	3.776	84	12	221	9	11	19	10	3	18	34	18	13	493
L1	Lepisanthes tetraphylla	Sadhana Forest	Cuddalore sandstone		22.245	1.116	13.472	6.912	1.149	0.155	0.967	0.088	428.483	4.389	227	5	424	8	11	23	22	4	41	37	17	20	526
L2		Puthupet Sacred Grove	Alluvium		22.865	0.447	9.698	1.418	0.424	0.233	0.298	0.132	435.645	3.673	64	5	202	14	12	21	11	6	16	38	16	12	466
L3		Puthupet Sacred Grove	Alluvium		9.904	0.594	7.91	1.495	0.422	0.233	0.52	0.175	447.103	4.619	90	9	240	9	12	15	8	0	20	32	16	12	695
L4		Sadhana Forest	Cuddalore sandstone		44.81	2.091	23.378	5.934	2.429	0.312	0.672	0.132	401.452	3.801	188	9	336	13	11	43	28	6	42	51	21	28	427
S1	Sapindus emarginatus	Aurodam	Cuddalore sandstone		45.213	1.819	20.085	3.224	0.801	0.396	1.061	0.223	410.736	4.716	148	12	169	15	13	39	21	7	35	62	23	30	564
S2		Pitchandikulam	Cuddalore sandstone		33.961	0.601	19.044	1.428	0.488	0.157	0.451	0.088	420.447	4.489	80	9	186	10	11	26	9	6	18	56	22	17	463
S3		Puthupet Sacred Grove	Alluvium		18.845	0.448	9.991	1.587	0.485	0.312	0.373	0.132	438.726	3.678	78	9	280	9	14	24	12	6	18	36	17	12	442
S4		Kuilapalayam	Cuddalore sandstone		28.924	3.204	16.654	1.751	0.848	0.311	0.671	0.526	422.824	4.335	130	12	255	17	11	24	11	0	32	47	13	54	339
A1	Artocarpus heterophyllus	Sadhana Forest	Cuddalore sandstone	Control	38.519	1.568	21.405	6.184	1.457	0.234	0.747	0.088	408.713	4.465	202	8	473	12	11	35	24	5	39	51	18	27	483
A2		Sadhana Forest	Cuddalore sandstone		41.964	0.968	21.061	6.916	1.634	0.233	0.521	0.088	405.018	5.595	219	8	221	11	12	33	28	6	38	56	22	25	649
A3		Lake Estate	Cuddalore sandstone		43.184	0.599	21.331	2.096	0.609	0.313	0.3	0.176	408.449	4.358	99	16	161	9	12	35	17	6	19	59	16	18	351
A4		Lake Estate	Cuddalore sandstone		53.49	0.818	22.863	1.998	0.544	0.544	0.446	0.131	394.902	5.048	110	19	153	12	12	40	15	6	19	67	18	20	435
D1	Diospyros ebenum	Puthupet Sacred Grove	Alluvium		12.841	0.672	8.168	1.337	0.486	0.156	0.373	0.132	445.543	3.439	71	6	283	7	11	17	8	4	18	30	13	13	440
D2		Puthupet Sacred Grove	Alluvium		14.964	0.446	8.837	1.332	0.423	0.233	0.446	0.131	441.402	3.726	72	7	300	8	11	18	8	4	17	32	15	11	511
D3		Puthupet Sacred Grove	Alluvium		13.402	0.298	8.786	1.335	0.364	0.156	0.224	0.088	445.089	3.433	71	9	309	8	11	19	8	0	15	32	15	10	463
D4		Puthupet Sacred Grove	Alluvium		14.616	0.295	7.504	1.32	0.419	0.462	0.368	0.13	444.486	3.573	73	18	146	7	12	16	9	4	18	31	14	11	450
L1	Lepisanthes tetraphylla	Sadhana Forest	Cuddalore sandstone		73.321	2.759	35.934	10.182	3.941	0.234	0.82	0.088	362.551	5.242	306	8	465	18	13	54	42	7	59	78	24	35	561
L2		Puthupet Sacred Grove	Alluvium		20.783	0.372	9.249	1.331	0.483	0.388	0.297	0.131	438.001	3.362	67	7	205	9	11	19	10	3	16	36	14	12	442
L3		Puthupet Sacred Grove	Alluvium		12.52	0.373	9.435	1.421	0.425	0.312	0.448	0.176	444.233	4.223	79	10	395	12	12	19	9	5	18	33	18	11	590
L4		Sadhana Forest	Cuddalore sandstone		55.698	3.215	29.543	7.699	3.222	0.234	0.449	0.088	384.774	4.592	260	8	400	16	13	48	30	9	56	65	24	31	761
S1	Sapindus emarginatus	Aurodam	Cuddalore sandstone		35.959	3.29	15.16	4.017	1.034	0.39	2.917	0.308	408.819	3.504	201	10	92	11	11	25	18	8	72	46	16	40	415
S2		Pitchandikulam	Cuddalore sandstone		37.718	0.595	20.262	1.498	0.544	0.155	0.521	0.087	409.731	4.926	76	9	175	12	13	30	10	6	19	56	19	18	501
S3		Puthupet Sacred Grove	Alluvium		17.939	0.368	8.804	1.481	0.478	0.154	0.294	0.13	440.722	3.564	67	5	202	7	11	18	10	5	15	36	14	11	442
S4		Kuilapalayam	Cuddalore sandstone		18.573	0.673	10.016	1.256	0.426	0.078	0.673	0.264	441.07	3.324	71	6	147	8	10	15	7	0	21	33	9	14	284
L4	Lepisanthes tetraphylla	Sadhana Forest	Cuddalore sandstone	Near root soil	44.303	35.543	25.033	7.407	6.651	0.311	0.818	0.525	374.268	4.446	379	8	505	21	11	46	36	10	241	54	23	62	503

## Sheet: S.Table_9_XRD_data
Tree number	Species	Sampling site	Parent material	Sample type	Phyllosilicates	Quartz	K-feldspar	Na-plagioclases	Calcite	Hematite	Goethite	Un-identified
					(g kg-1)	(g kg-1)	(g kg-1)	(g kg-1)	(g kg-1)	(g kg-1)	(g kg-1)	(g kg-1)
S3	Sapindus emarginatus	Puthupet Sacred Grove	Alluvium	Trunk soil	128.266	728.9	8.20152	36.7	5.32405	0	12.706	79.9027
A1	Artocarpus heterophyllus	Sadhana Forest	Cuddalore sandstone	Adjacent soil	127.18	814.5	31.29	9.56	0	0	0	17.46
A2	Artocarpus heterophyllus	Sadhana Forest	Cuddalore sandstone	Adjacent soil	109.96	817.88	17.79	5.68	2.24	2.78	11.58	32.09
A4	Artocarpus heterophyllus	Lake Estate	Cuddalore sandstone	Adjacent soil	126.46	793.4	7.83	7.61	0	3.68	14.94	46.08
L1	Lepisanthes tetraphylla	Sadhana Forest	Cuddalore sandstone	Adjacent soil	171.61	751.2	24.74	5.83	0	0	0	46.62
L4	Lepisanthes tetraphylla	Sadhana Forest	Cuddalore sandstone	Adjacent soil	196.7	721.2	22.96	7.07	0	0	17.95	34.11
S1	Sapindus emarginatus	Aurodam	Cuddalore sandstone	Adjacent soil	164.38	789.34	6.72	7.12	0	3.04	11.29	18.1
S2	Sapindus emarginatus	Pitchandikulam	Cuddalore sandstone	Adjacent soil	163.4	705.6	21	6.47	2.46	4.87	14.12	82.09
S3	Sapindus emarginatus	Puthupet Sacred Grove	Alluvium	Adjacent soil	132.72	841.75	6.3	5	0	0	12.15	2.09
S4	Sapindus emarginatus	Kuilapalayam	Cuddalore sandstone	Adjacent soil	124.5	761.2	6.59	9.47	0	0	10.01	88.23
A2	Artocarpus heterophyllus	Sadhana Forest	Cuddalore sandstone	Control	120.92	821.2	19.56	6.25	2.47	3.05	12.74	13.82
A4	Artocarpus heterophyllus	Lake Estate	Cuddalore sandstone	Control	208.89	601.2	113.4	4.91	0	6.96	23.37	41.27
S1	Sapindus emarginatus	Aurodam	Cuddalore sandstone	Control	105.74	397.16	7.76	432.3	0	2.97	9.51	44.55
S2	Sapindus emarginatus	Pitchandikulam	Cuddalore sandstone	Control	173.75	761.2	6.54	4.5	2.14	4.76	16	31.12
S3	Sapindus emarginatus	Puthupet Sacred Grove	Alluvium	Control	102.91	830.25	12.82	5.26	0	0	12.44	36.31
S4	Sapindus emarginatus	Kuilapalayam	Cuddalore sandstone	Control	142.5	800.3	19.3	6.6	0	0	10.5	20.8
L4	Lepisanthes tetraphylla	Sadhana Forest	Cuddalore sandstone	Near root soil	174.5	673.3	42.07	0	0	0	18.97	91.17

## Sheet: S.Table_10_oxalotrophs
Known / Unknown Oxalotrophs	Order	Family	Genus
Known	Burkholderiales	Burkholderiaceae	Burkholderia
			Cupriavidus
			Pandoraea
		Ralstoniaceae	Ralstonia
	Hyphomicrobiales	Bradyrhizobiaceae	Afipia
		Xanthobacteraceae	Xanthobacter
Unknown	Betaproteobacteria	Rhodocyclales	Rhodocyclales Uncult.
	Hyphomicrobiales	Bradyrhizobiaceae	Hartmannibacter
		Hyphomicrobiaceae	Tardiphaga
		Methylocystaceae	Methylobrevis
		Xanthobacteraceae	Hansschlegelia
	Micromonosporales	Micromonosporaceae	Micromonospora
	Nitrospirales	Nitrospiraceae	Nitrospira
	Pseudonocardiales	Pseudonocardiaceae	Kutzneria
			Saccharopolyspora
	Streptosporangiales	Streptosporangiaceae	Nonomuraea
			Planotetraspora
			Planobispora
